# Supplementary material for: Sensitised near-infrared luminescence from lanthanide(iii) centres using Re(i) and Pt(ii) diimine complexes as energy donors in d–f dinuclear complexes based on 2,3-bis(2-pyridyl)pyrazine
Source: Royal Society of Chemistry journal article supplement (doi:10.1039/b616423d), 2007-01-01
Supplement: b616423d.pdf [file b616423d.pdf]

**Sensitised near-infrared luminescence from lanthanide(III) centres using Re(I) and Pt(II) diimine complexes as energy donors in d-f dinuclear complexes based on 2,3-bis(2-pyridyl)pyrazine**

**Frazer Kennedy, Nail M. Shavaleev, Thelma Koullourou, Zoë R. Bell, John C. Jeffery, Stephen Faulkner, and Michael D. Ward**

*Supporting information: Crystal structure of [Re(CO)<sub>3</sub>Cl(dpq)][Gd(hfac)<sub>3</sub>(H<sub>2</sub>O)<sub>2</sub>]•C<sub>6</sub>H<sub>6</sub>*

**Table S1.** Crystal data, data collection and refinement details for [Re(CO)<sub>3</sub>Cl(dpq)][Gd(hfac)<sub>3</sub>(H<sub>2</sub>O)<sub>2</sub>]•C<sub>6</sub>H<sub>6</sub>

|                                                            |                                                                                                                         |
|------------------------------------------------------------|-------------------------------------------------------------------------------------------------------------------------|
| Complex                                                    | [Re(CO) <sub>3</sub> Cl(dpq)]<br>[Gd(hfac) <sub>3</sub> (H <sub>2</sub> O) <sub>2</sub> ]•C <sub>6</sub> H <sub>6</sub> |
| Formula                                                    | C <sub>42</sub> H <sub>21</sub> ClF <sub>18</sub> GdN <sub>4</sub> O <sub>11</sub> Re                                   |
| Formula weight                                             | 1478.53                                                                                                                 |
| <i>T</i> (K)                                               | 173(2)                                                                                                                  |
| Crystal system, space group                                | Triclinic, <i>P</i> -1                                                                                                  |
| <i>a</i> (Å)                                               | 9.525(2)                                                                                                                |
| <i>b</i> (Å)                                               | 13.034(3)                                                                                                               |
| <i>c</i> (Å)                                               | 23.796(6)                                                                                                               |
| $\alpha$ (°)                                               | 105.83(3)                                                                                                               |
| $\beta$ (°)                                                | 90.746(19)                                                                                                              |
| $\gamma$ (°)                                               | 108.622(17)                                                                                                             |
| <i>V</i> (Å <sup>3</sup> )                                 | 2677.0(11)                                                                                                              |
| <i>Z</i>                                                   | 2                                                                                                                       |
| <i>D</i> <sub>calc</sub> (Mg/m <sup>3</sup> )              | 1.834                                                                                                                   |
| $\mu$ (mm <sup>-1</sup> )                                  | 3.656                                                                                                                   |
| Reflections (total, independent, <i>R</i> <sub>int</sub> ) | 22934, 9403, 0.0437                                                                                                     |
| Data / restraints / parameters                             | 9403, 37, 618                                                                                                           |
| Final <i>R</i> 1, <i>wR</i> 2 indices <sup>b</sup>         | 0.0649, 0.1907                                                                                                          |

**Table S2.** Selected bond distances (Å) and angles (°) for the structure of [Re(CO)<sub>3</sub>Cl(dpq)][Gd(hfac)<sub>3</sub>(H<sub>2</sub>O)<sub>2</sub>]•C<sub>6</sub>H<sub>6</sub>

|                   |           |                   |           |
|-------------------|-----------|-------------------|-----------|
| Gd(1)-O(115)      | 2.335(10) | Re(1)-C(41)       | 1.914(11) |
| Gd(1)-O(125)      | 2.323(12) | Re(1)-C(51)       | 1.916(11) |
| Gd(1)-O(111)      | 2.356(10) | Re(1)-C(61)       | 1.912(12) |
| Gd(1)-O(135)      | 2.393(10) | Re(1)-N(11)       | 2.164(8)  |
| Gd(1)-O(2)        | 2.385(8)  | Re(1)-N(21)       | 2.243(8)  |
| Gd(1)-O(121)      | 2.377(11) | Re(1)-Cl(5)       | 2.469(3)  |
| Gd(1)-O(131)      | 2.400(8)  |                   |           |
| Gd(1)-O(1)        | 2.432(12) |                   |           |
| C(41)-Re(1)-C(51) | 90.3(5)   | C(61)-Re(1)-N(21) | 104.5(4)  |
| C(41)-Re(1)-C(61) | 85.3(4)   | N(11)-Re(1)-N(21) | 74.6(3)   |
| C(51)-Re(1)-C(61) | 89.6(4)   | C(41)-Re(1)-Cl(5) | 92.2(3)   |
| C(41)-Re(1)-N(11) | 95.5(4)   | C(51)-Re(1)-Cl(5) | 177.1(3)  |
| C(51)-Re(1)-N(11) | 92.0(4)   | C(61)-Re(1)-Cl(5) | 92.2(3)   |
| C(61)-Re(1)-N(11) | 178.3(4)  | N(11)-Re(1)-Cl(5) | 86.2(2)   |
| C(41)-Re(1)-N(21) | 168.8(4)  | N(21)-Re(1)-Cl(5) | 82.0(2)   |
| C(51)-Re(1)-N(21) | 95.4(4)   |                   |           |

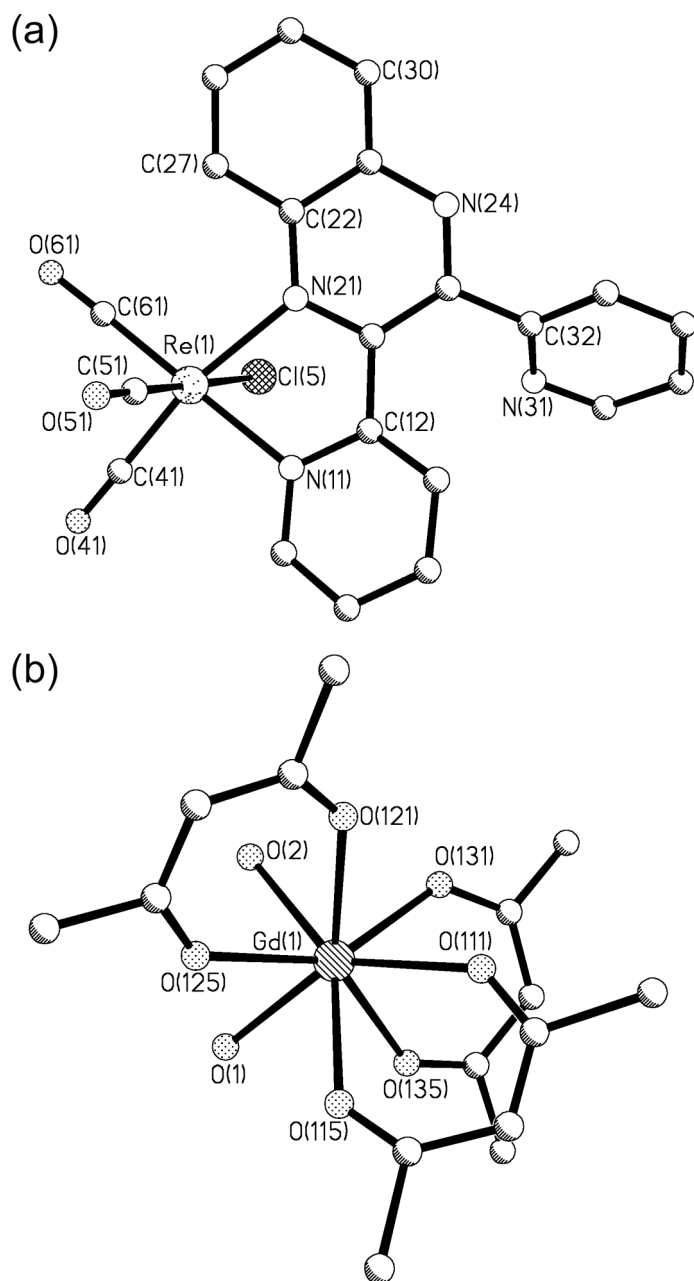

**Fig. S1:** Molecular structures of (a) the  $[\text{Re}(\text{CO})_3\text{Cl}(\text{dpq})]$  complex unit and (b) the  $[\text{Gd}(\text{hfac})_3(\text{H}_2\text{O})_2]$  complex unit, from crystals of  $[\text{Re}(\text{CO})_3\text{Cl}(\text{dpq})][\text{Gd}(\text{hfac})_3(\text{H}_2\text{O})_2] \cdot \text{C}_6\text{H}_6$

In the  $[\text{Re}(\text{CO})_3\text{Cl}(\text{dpq})]$  complex unit the coordinated and free pyridyl rings are twisted from the plane of the coordinated quinoxaline unit by  $24^\circ$  and  $45^\circ$  respectively. In the  $[\text{Gd}(\text{hfac})_3(\text{H}_2\text{O})_2]$  unit the Gd(III) centre has an 8-coordinate square antiprismatic geometry, with the oxygen atoms of the two water ligands [O(1) and O(2)] and one of the hfac ligands [O(131) and O(135)] forming one approximate square plane, and the oxygen atoms of the remaining two hfac ligands [O(111), O(115), O(121), O(125)] forming the other.
